# Supplementary material for: Glycidylmethacrylate based resin functionalized with graphene oxide for column preconcentration and trace determination of Cd(ii) and Ni(ii) in environmental and food samples
Source: Royal Society of Chemistry journal article supplement (doi:10.1039/c6ra15612f), 2016-01-01
Supplement: c6ra15612f1.pdf [file c6ra15612f1.pdf]

### **Electronic Supplementary Information**

**Glycidyl methacrylate based resin functionalized with graphene oxide for column preconcentration and trace determination of Cd(II) and Ni(II) in environmental and food samples**

**Aminul Islam\*and Suneel Kumar**

Analytical Research Laboratory, Department of Chemistry, Aligarh Muslim University, Aligarh, India-202 002

Journal: RSC Advances

#### **Contents**

ESI1. FTIR spectrum of p-DETAGO

ESI2. <sup>13</sup>C NMR spectrum of p-DETAGO

ESI3. TGA/DTA analysis of p-DETAGO

ESI4. The point of zero charge (pHpzc) of p-DETAGO

Table S1. Effect of temperature on the sorption and loading half time of Ni(II) and Cd(II)

---

\*Corresponding author: Analytical Research Laboratory, Department of Chemistry, Aligarh Muslim University, Aligarh, India -202 002 Tel.: +91 9358979659; E-mail address: [aminulislam.ch@amu.ac.in](mailto:aminulislam.ch@amu.ac.in)

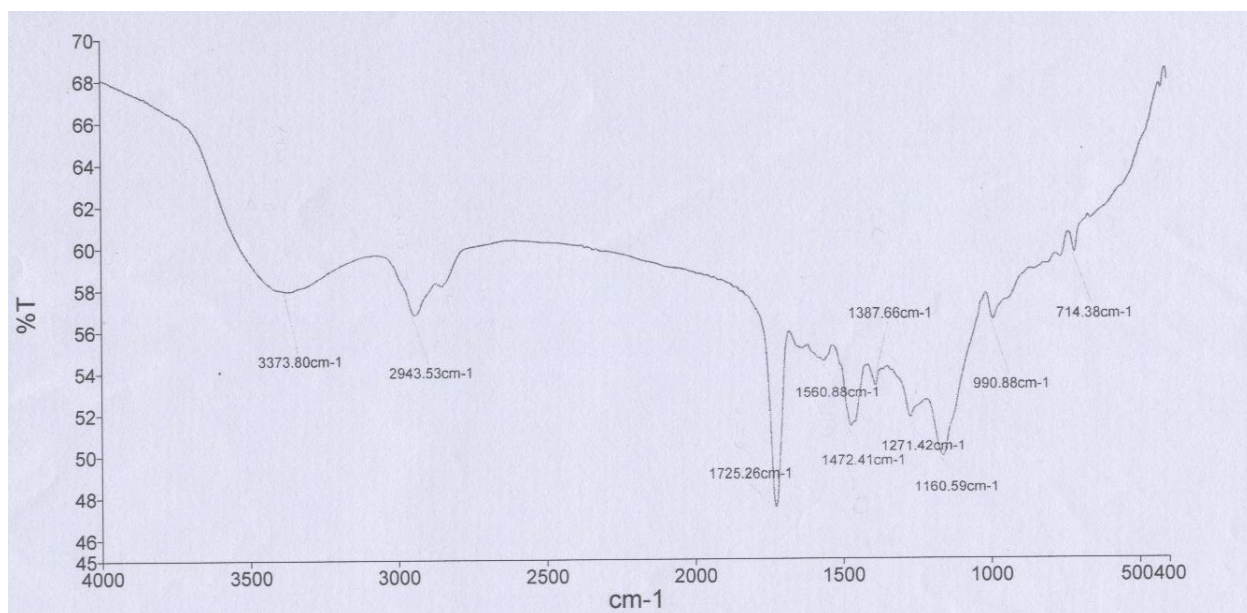

ESI1. FTIR spectrum of p-DETAGO

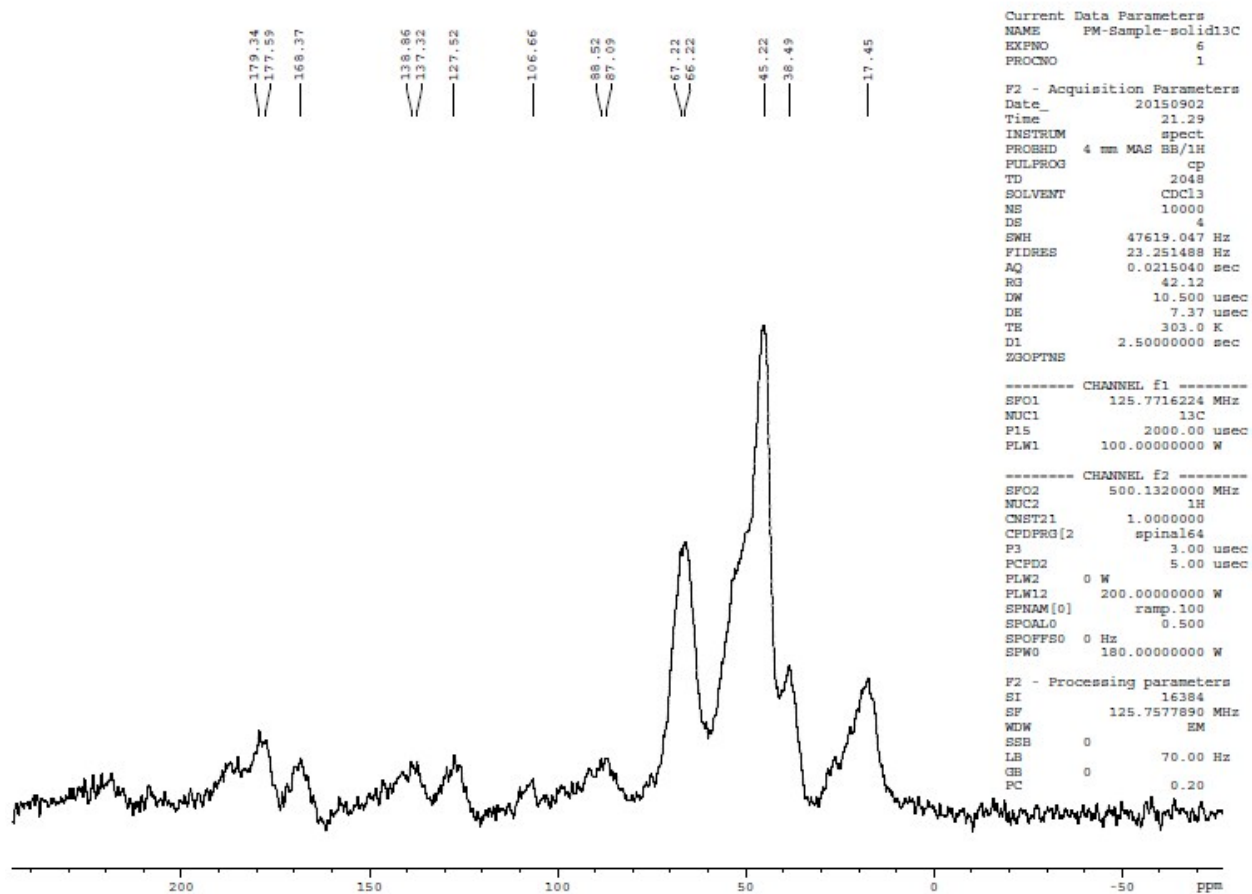

ESI2. <sup>13</sup>C NMR spectrum of p-DETAGO

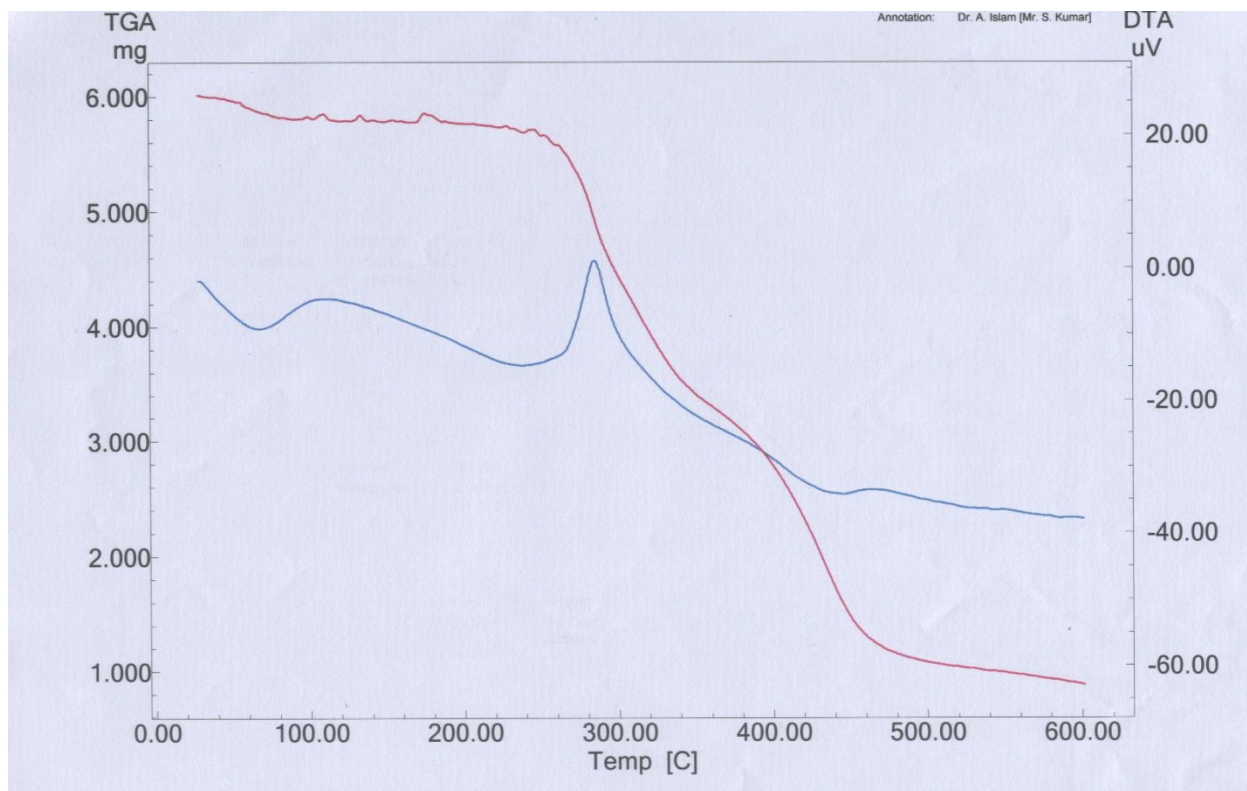

ESI3. TGA/DTA analysis of p-DETAGO

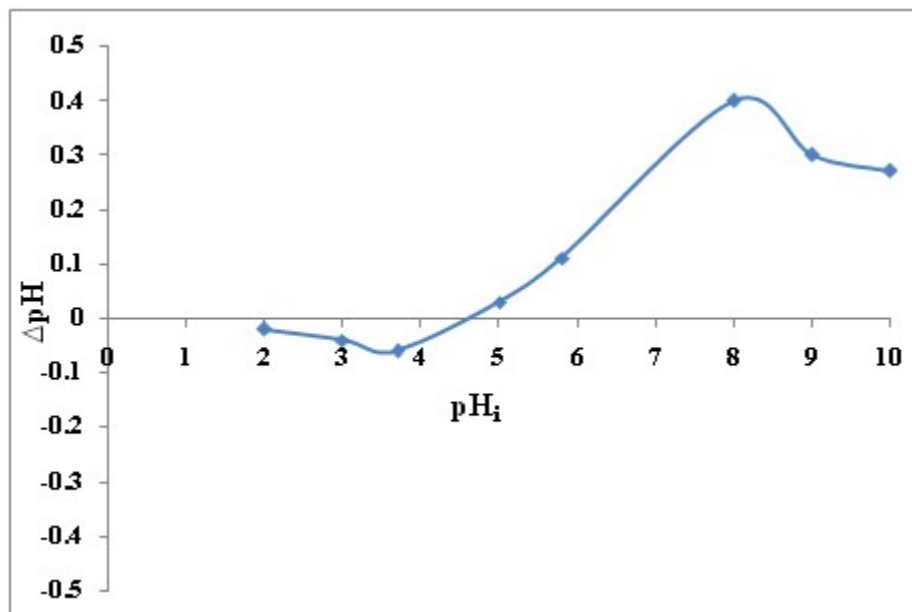

ESI4. The point of zero charge (pHpzc) of p-DETAGO

**Table S1. Effect of temperature on the sorption and loading half time of Ni(II) and Cd(II) (Experimental conditions : 0.1 g resin, 50mL solution of 0.05mM Ni(II) and Cd(II))**

| Temperature | Sorption capacity (mg g <sup>-1</sup> ) |        | Loading half time $t^{1/2}$ /min |        |
|-------------|-----------------------------------------|--------|----------------------------------|--------|
|             | Ni(II)                                  | Cd(II) | Ni(II)                           | Cd(II) |
| 25±0.2°C    | 17.02                                   | 38.78  | 15                               | 10     |
| 35±0.2°C    | 19.95                                   | 41.59  | 10                               | 8      |
| 45±0.2°C    | 21.13                                   | 43.84  | 5                                | 5      |
